# Supplementary material for: High prevalence of Trichomonas gallinae in wild columbids across western and southern Europe
Source: PubMed Central journal article supplement (PMC5437606; doi:10.1186/s13071-017-2170-0), 2017-05-18

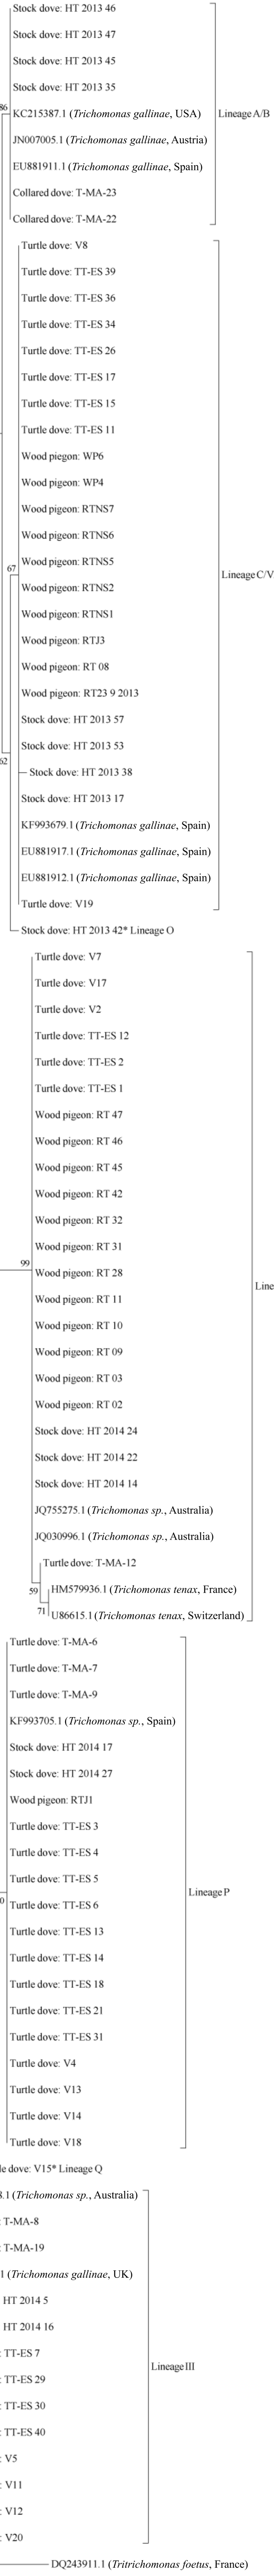

Supplement: 13071_2017_2170_MOESM4_ESM.pdf [file 13071_2017_2170_MOESM4_ESM.pdf]
